# Supplementary material
Source: PubMed Central journal article supplement (PMC7338218)
Supplement: EMS86519-supplement-Appendix.pdf [file EMS86519-supplement-Appendix.pdf]

# THE LANCET

## Haematology

### Supplementary appendix

This appendix formed part of the original submission and has been peer reviewed. We post it as supplied by the authors.

Supplement to: Pabinger I, van Es N, Heinze G, et al. A clinical prediction model for cancer-associated venous thromboembolism: a development and validation study in two independent prospective cohorts. *Lancet Haematol* 2017; published online June 6. [http://dx.doi.org/10.1016/S2352-3026\(18\)30063-2](http://dx.doi.org/10.1016/S2352-3026(18)30063-2).

**Supplementary Web Appendix,**

**Pabinger et al, Lancet Haematology 2018**

| Variable                  | Levels or Unit of measurement                                                                              | Laboratory assay / Method of measurement                                                     |
|---------------------------|------------------------------------------------------------------------------------------------------------|----------------------------------------------------------------------------------------------|
| Tumor site category       | 0=Breast, Prostate<br>1=Lung, Colorectal, Kidney, Lymphoma, Others<br>2=Pancreas, Gastric                  | Prospective documentation                                                                    |
| Female sex                | 0=Male, 1=Female                                                                                           | Prospective documentation                                                                    |
| Tumor grade               | 0=G1+G2, 1=G3+G4                                                                                           | Prospective documentation                                                                    |
| Lymph node metastasis     | 0=TNM N0, 1=TNM N1-3                                                                                       | Prospective documentation                                                                    |
| Distant metastasis        | 0=TNM c/pM0, 1=TNM c/pM1                                                                                   | Prospective documentation                                                                    |
| ESA use                   | 0=No documented ESA use within first 3 months of F/U,<br>1=Documented ESA use within first 3 months of F/U | Retrospective documentation                                                                  |
| Age at entry              | Years                                                                                                      | Prospective documentation                                                                    |
| Haemoglobin               |                                                                                                            | CATS: Sysmex XE systems (varying models over time from XE-2000 to XE-5000), MICA: N/A        |
| Absolute Leukocyte count  | 10 <sup>9</sup> /liter (i.e. G/L)                                                                          | CATS: Sysmex XE systems (varying models over time from XE-2000 to XE-5000), MICA: N/A        |
| Absolute Neutrophil count | 10 <sup>9</sup> /liter (i.e. G/L)                                                                          | CATS: Sysmex XE systems (varying models over time from XE-2000 to XE-5000), MICA: N/A        |
| Platelet count            | 10 <sup>9</sup> /liter (i.e. G/L)                                                                          | CATS: Sysmex XE systems (varying models over time from XE-2000 to XE-5000), MICA: N/A        |
| Mean Platelet Volume      | fL                                                                                                         | CATS: Sysmex XE systems (varying models over time from XE-2000 to XE-5000), MICA: N/A        |
| Body mass index (BMI)     | kg/m <sup>2</sup>                                                                                          | Prospective documentation                                                                    |
| Fibrinogen                | mg/dL                                                                                                      | CATS: Clauss method; MICA: N/A                                                               |
| FVIII                     | % activity (as compared to reference plasma)                                                               | CATS: Coagulometry; MICA: N/A                                                                |
| D-Dimer                   | μg/mL                                                                                                      | CATS: STA-LIAtest D-DI assay (Diagnostica-Stago, Asnieres, France); MICA: INNOVANCE, Siemens |
| Soluble P-selectin        | ng/mL                                                                                                      | CATS: Soluble P-selectin ELISA (R&D Systems, Minneapolis, MN, USA); MICA: Soluble P-         |

|                          |                         |                                                                        |
|--------------------------|-------------------------|------------------------------------------------------------------------|
|                          |                         | selectin ELISA (R&D Systems, Minneapolis, MN, USA)                     |
| Prothrombin Fragment 1·2 |                         | CATS: Enzygnost F 1+2 (Dade-Behring, Marburg, Germany); MICA: N/A      |
| TGA – Peak of Curve      | nM of Thrombin          | CATS: Technothrombin TGA kit (Technoclone, Vienna, Austria); MICA: N/A |
| TGA – Velocity Index     | nM of Thrombin / minute | CATS: Technothrombin TGA kit (Technoclone, Vienna, Austria); MICA: N/A |

**Supplementary Table 1. Variables included in the clinical prediction model development process in CATS.** The first column reports all variables that were used for development of the clinical prediction model in CATS. The second columns reports corresponding variable levels (for categorical variables) or units of measurement (for continuous variables). The third column reports the laboratory assays or ascertainment method used for biomarker assessment or variable measurement. TNM – Tumor node metastasis classification, c/p – either clinically or pathologically assessed, ESA – Erythropoiesis-stimulating agents, CATS – Vienna Cancer and Thrombosis Study, MICA – Multinational Cohort Study to Identify Risk Factors for Venous Thromboembolism in patients with Cancer, G/L – Giga/Liter, fL – femtoliter, FVIII – Coagulation factor VIII, TGA – Thrombin generation assay.

| Variable                                        | Univariable analysis |                       | Standardized Univariable analysis |                      |
|-------------------------------------------------|----------------------|-----------------------|-----------------------------------|----------------------|
|                                                 | HR                   | 95% CI (p)            | Stand. HR                         | 95% CI (p)           |
| <b>Clinical Variables</b>                       |                      |                       |                                   |                      |
| BMI (per doubling)                              | 1.76                 | 0.87-3.56 (p=0.12)    | 1.16                              | 0.96-1.39 (p=0.12)   |
| Female sex                                      | 0.93                 | 0.64-1.34 (p=0.68)    | N/A                               | N/A                  |
| Use of erythropoiesis-stimulating agents (ESAs) | 2.77                 | 1.40-5.48 (p=0.003)   | N/A                               | N/A                  |
| <b>Tumor site category</b>                      |                      |                       |                                   |                      |
| ---Low/Intermediate Risk of VTE                 | Ref.                 | Ref.                  | N/A                               | N/A                  |
| ---High Risk of VTE                             | 2.79                 | 1.55-5.04 (p=0.001)   | N/A                               | N/A                  |
| ---Very High Risk of VTE                        | 6.48                 | 3.36-12.50 (p<0.0001) | N/A                               | N/A                  |
| <b>Tumor characteristics</b>                    |                      |                       |                                   |                      |
| Tumor grade G3/G4                               | 1.48                 | 1.02-2.15 (p=0.04)    | N/A                               | N/A                  |
| Lymph node metastasis                           | 2.11                 | 1.34-3.34 (p=0.001)   | N/A                               | N/A                  |
| Distant metastasis                              | 1.67                 | 1.15-2.42 (p=0.007)   | N/A                               | N/A                  |
| <b>Laboratory Parameters &amp; Biomarkers</b>   |                      |                       |                                   |                      |
| Haemoglobin (per doubling)                      | 0.51                 | 0.22-1.17 (p=0.11)    | 0.87                              | 0.72-1.03 (p=0.11)   |
| Absolute Leukocyte count (per doubling)         | 1.07                 | 0.90-1.29 (p=0.44)    | 1.07                              | 0.91-1.25 (p=0.44)   |
| Absolute Neutrophil count (per doubling)        | 1.28                 | 1.01-1.62 (p=0.04)    | 1.19                              | 1.01-1.40 (p=0.04)   |
| Platelet count (per doubling)                   | 1.37                 | 0.98-1.93 (p=0.07)    | 1.22                              | 0.99-1.50 (p=0.07)   |
| Mean platelet volume (per doubling)             | 0.64                 | 0.15-2.70 (p=0.54)    | 0.94                              | 0.78-1.14 (p=0.54)   |
| D-Dimer (per doubling)                          | 1.43                 | 1.29-1.59 (p<0.0001)  | 1.75                              | 1.48-2.06 (p<0.0001) |
| sP-Selectin (per doubling)                      | 1.40                 | 1.02-1.93 (p=0.04)    | 1.25                              | 1.01-1.53 (p=0.04)   |
| Fibrinogen (per doubling)                       | 1.54                 | 0.99-2.39 (p=0.06)    | 1.21                              | 1.00-1.47 (p=0.06)   |
| Factor VIII activity (per doubling)             | 2.21                 | 1.53-3.18 (p<0.0001)  | 1.53                              | 1.26-1.87 (p<0.0001) |

|                                                      |      |                      |  |      |                      |
|------------------------------------------------------|------|----------------------|--|------|----------------------|
| Prothrombin fragment 1·2 (per doubling)              | 1·50 | 1·19-1·88 (p<0·0001) |  | 1·38 | 1·15-1·66 (p<0·0001) |
| Peak of Thrombin Generation (per doubling)           | 1·03 | 0·87-1·23 (p=0·73)   |  | 1·03 | 0·86-1·25 (p=0·73)   |
| Velocity Index of Thrombin Generation (per doubling) | 1·04 | 0·93-1·17 (p=0·51)   |  | 1·07 | 0·88-1·29 (p=0·51)   |

**Supplementary Table 2. Cause-specific hazards of VTE for variables included in the clinical prediction model development process in**

**CATS – Univariable and Standardized Univariable analysis.** Results were derived with univariable Cox regression models (“cause-specific hazards analysis”). Continuous variables were log2-transformed prior analysis (hence, they can be interpreted as the relative increase in the cause-specific hazard of VTE per doubling of the respective variable). Only continuous variables with a standardized hazard ratio below 0·80 or above 1·25 were considered for further model development with the LASSO method. Abbreviations: HR – Hazard Ratio, 95%CI (p) – 95% confidence interval (p-value), Stand. HR – Z-standardized hazard ratio (only applicable for continuous variables), N/A – not applicable (i.e. for categorical variables Z-standardization is not applicable), VTE – Venous Thromboembolism, sP-Selectin – Soluble P-Selectin.

| <b>VTE event</b>           | <b>n (%) in CATS</b> | <b>n (%) in MICA</b> |
|----------------------------|----------------------|----------------------|
| Pulmonary embolism (PE)    | 30 (37.5%)           | 22 (45.8%)           |
| Deep vein thrombosis (DVT) | 26 (32.5%)           | 16 (33.3%)           |
| DVT+PE                     | 7 (8.8%)             | 3 (6.3%)             |
| Fatal PE                   | 5 (6.3%)             | 2 (4.2%)             |
| Upper arm DVT              | 3 (3.8%)             | 5 (10.4%)            |
| Others                     | 9 (11.3%)            | 0 (0.0%)             |

**Supplementary Table 3. Distribution of VTE events in CATS (n=80 events) and MICA (n=48 events).** Event types are sorted by decreasing proportion in the CATS study (with “others” reported at the bottom of the table). Abbreviations: VTE – Venous Thromboembolism, CATS – Vienna Cancer and Thrombosis Study, MICA – Multinational Cohort Study to Identify Risk Factors for Venous Thromboembolism in patients with Cancer, DVT – Deep vein thrombosis, PE – Pulmonary embolism.

**Supplementary Paragraph 1. Externally-validated equation for predicting 6-month risk of VTE in outpatients with solid cancer.** The nomogram reported in the main manuscript (Figure 3) is based on the equation below, where *cancersite*=(0 for “low/intermediate risk of VTE” tumor sites, 1 for “high risk of VTE” tumor sites, and 2 for “very high risk of VTE” tumor sites) and D-Dimer has the unit  $\mu\text{g/mL}$ :

$$6\text{monthVTErisk}(\%) = 100 * (1 - (1 - 0.02137053)^{e(0.6709158 \times \text{cancersite} + 0.2793001 \times \log_2(\text{d dimer} + 1))})$$
